# Supplementary material
Source: HighWire-hosted journal article supplement (https://diabetes.diabetesjournals.org/content/suppl/2007/02/27/56.3.809)
Supplement: Pg809OnlineAppendixSupplementalFig.pdf [file Pg809OnlineAppendixSupplementalFig.pdf]

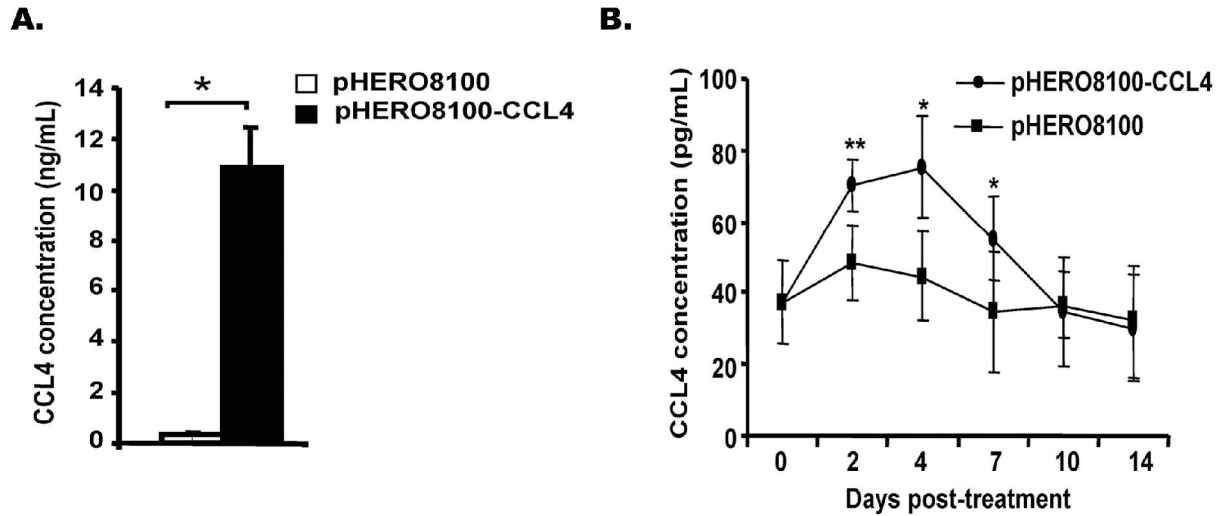

**Supplemental FIG. 1.** Gene transfer of pHERO8100-CCL4 induces CCL4 expression. **A:** COS-7 cells ( $1 \times 10^6$ ) were transfected in triplicate with either pHERO8100 or pHERO8100-CCL4 using cationic liposomes, and after 48 h culture supernatants were analyzed for their CCL4 content by direct ELISA. CCL4 concentration is expressed as the mean + SD (\*,  $p < 0.01$ ). Similar results were obtained in two separate experiments. **B:** Serum levels of CCL4 are elevated for 7 d following intradermal delivery of pHERO8100-CCL4 to female NOD mice. Young female NOD mice (3 week-old) were administered 1  $\mu$ g of pHERO8100 or pHERO8100-CCL4 at d 0. Serum samples were collected on day 0, 2, 4, 7, 10, 14 post-treatment and analyzed for CCL4 levels by ELISA (\*,  $p < 0.03$ ; \*\*,  $p < 0.01$ ).
